# Supplementary material
Source: PubMed Central journal article supplement (PMC9449599)

Figure 7C

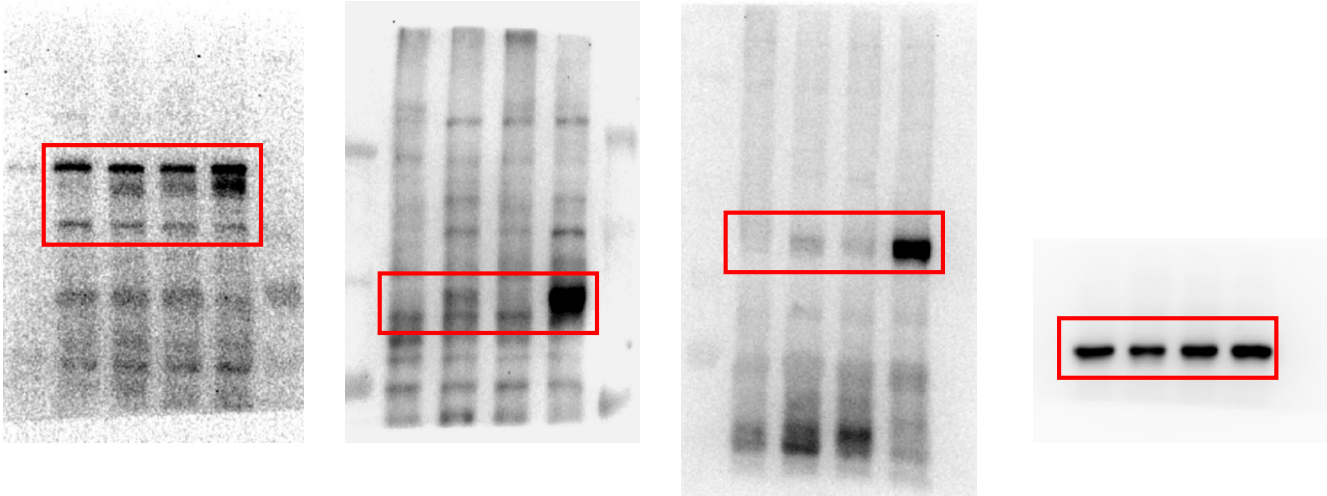

Figure 7E

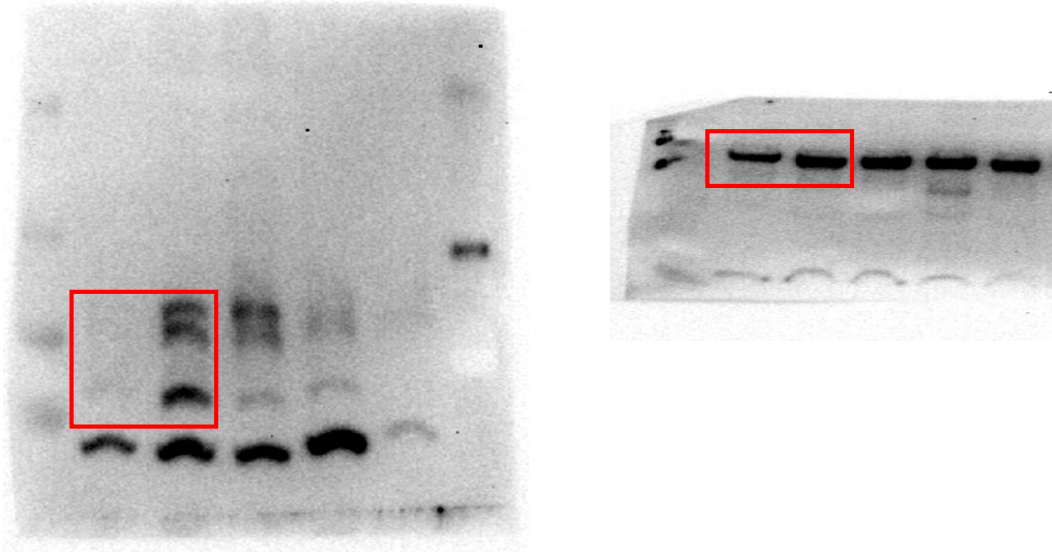

Supplement: EMMM-14-e15904-s001.pdf [file EMMM-14-e15904-s001.pdf]
