# Supplementary material
Source: PubMed Central journal article supplement (PMC9449599)

Figure 2A

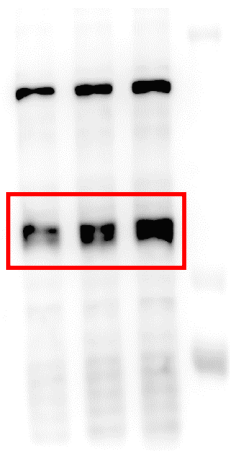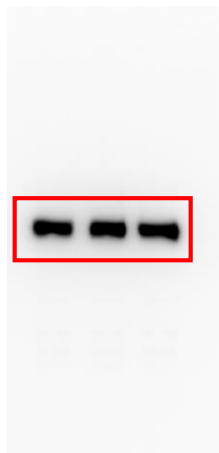

Figure 2C

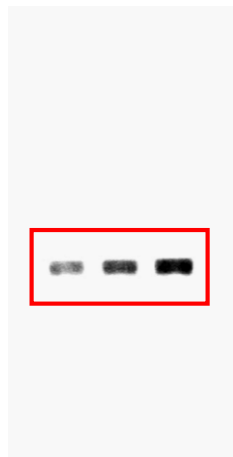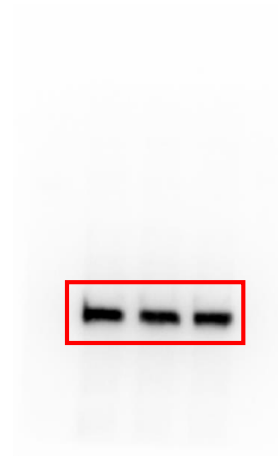

Supplement: EMMM-14-e15904-s003.pdf [file EMMM-14-e15904-s003.pdf]
