# Supplementary material
Source: PubMed Central journal article supplement (PMC9449599)

Figure 3B

---

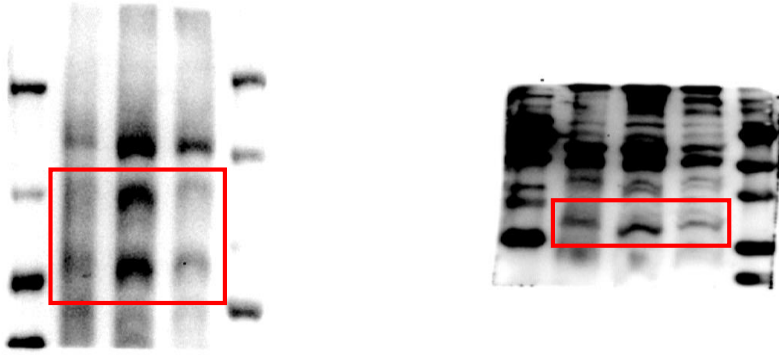

Figure 3C

---

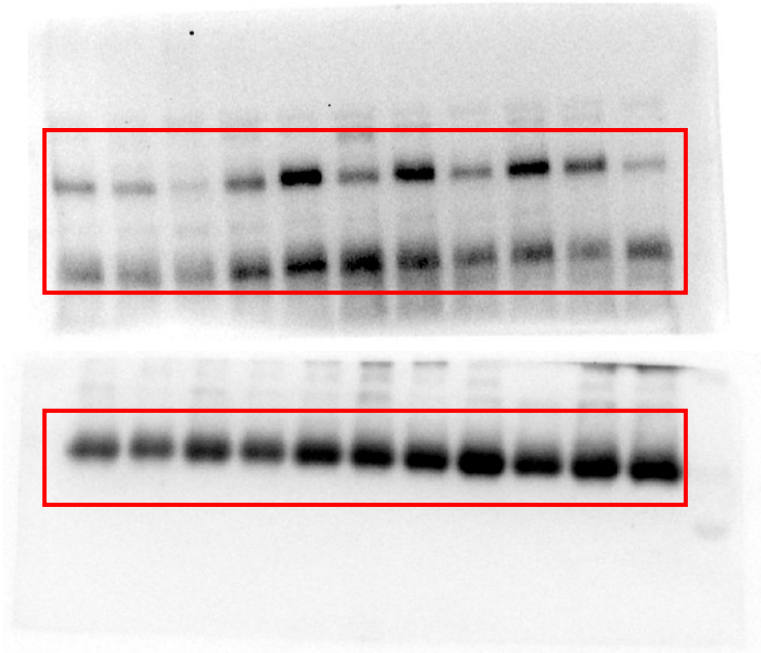

Supplement: EMMM-14-e15904-s004.pdf [file EMMM-14-e15904-s004.pdf]
