# Supplementary material
Source: PubMed Central journal article supplement (PMC9449599)

Figure 4B

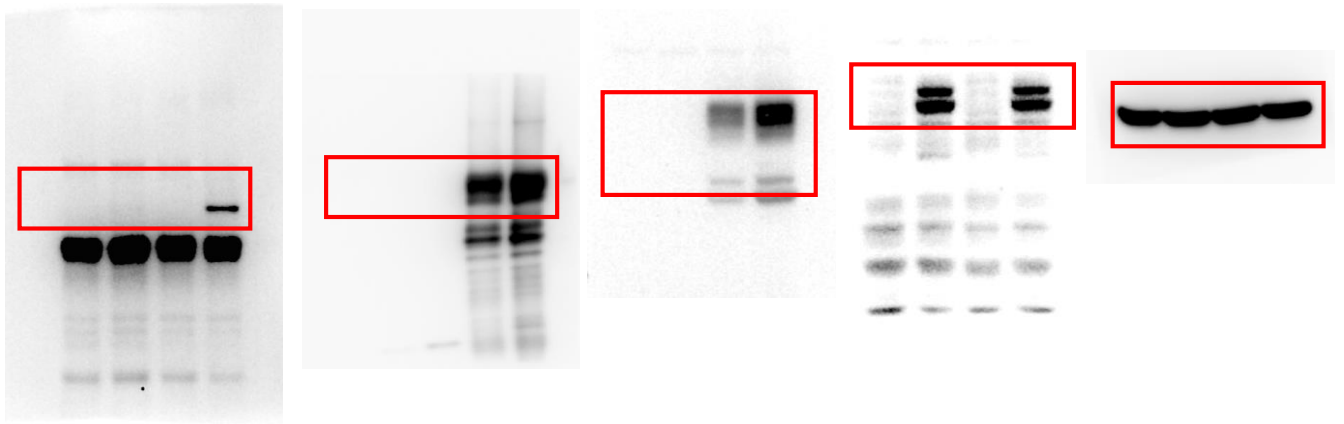

Figure 4D

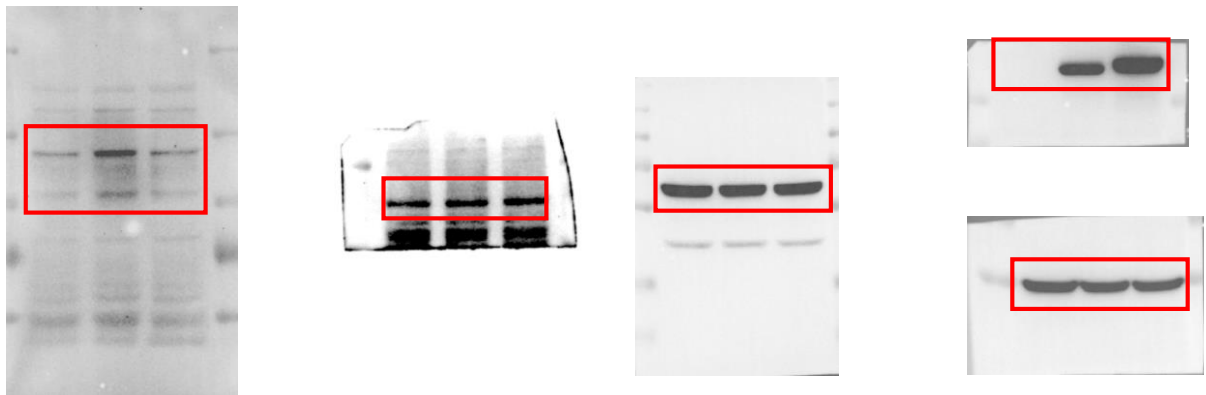

Figure 4E

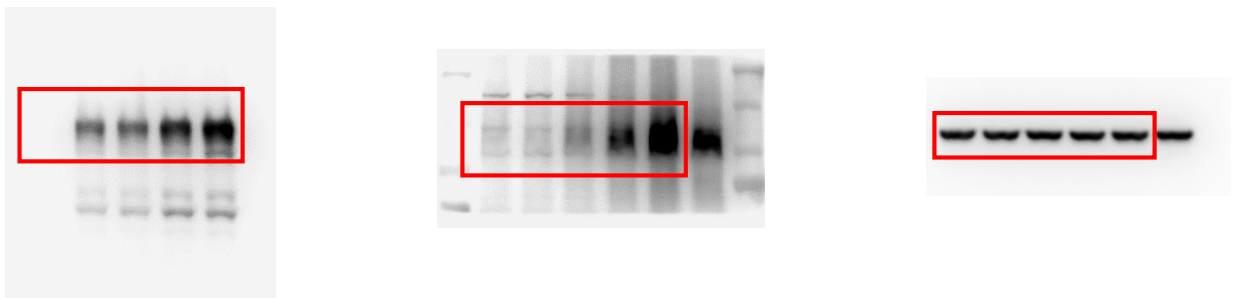

Figure 4F

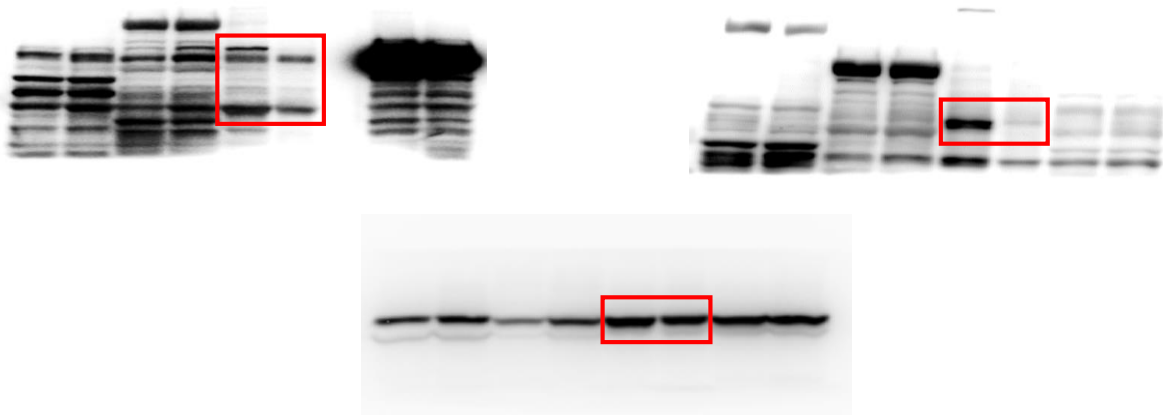

Figure 4G

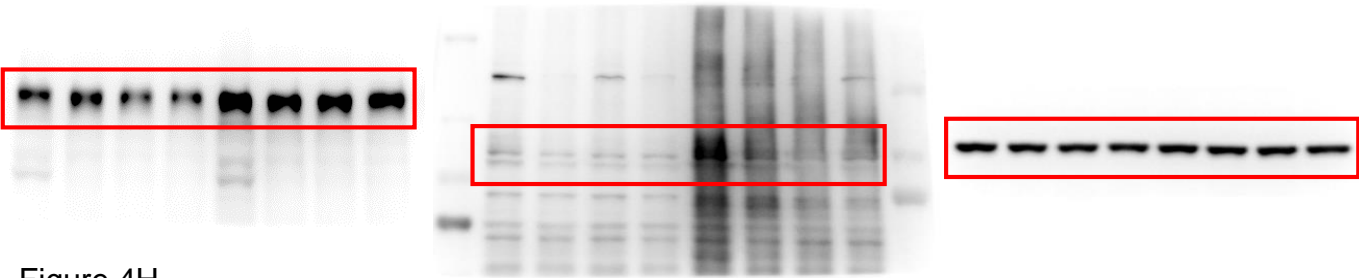

Figure 4H

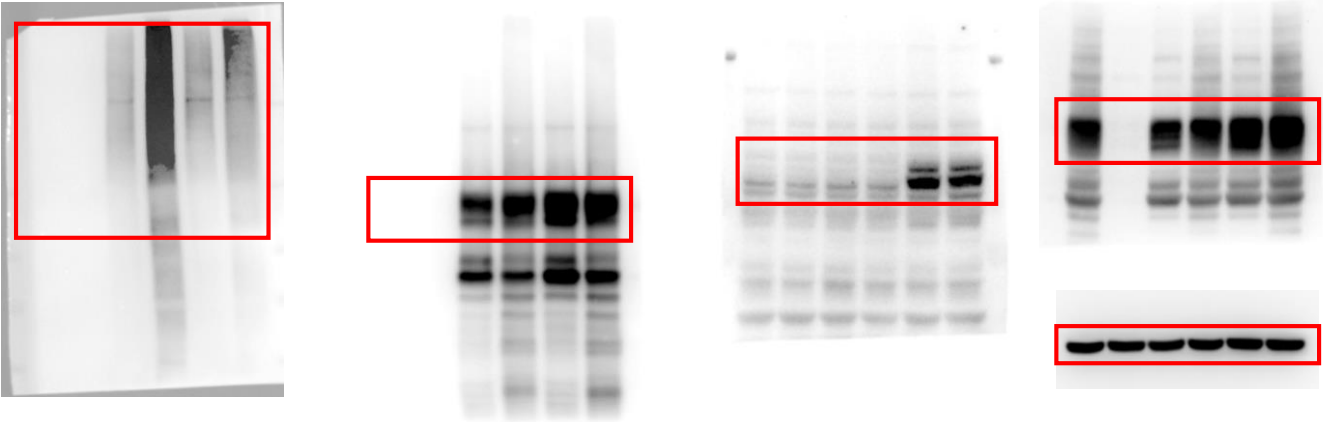

Supplement: EMMM-14-e15904-s006.pdf [file EMMM-14-e15904-s006.pdf]
