# Supplementary material
Source: PubMed Central journal article supplement (PMC9449599)

Figure 5A

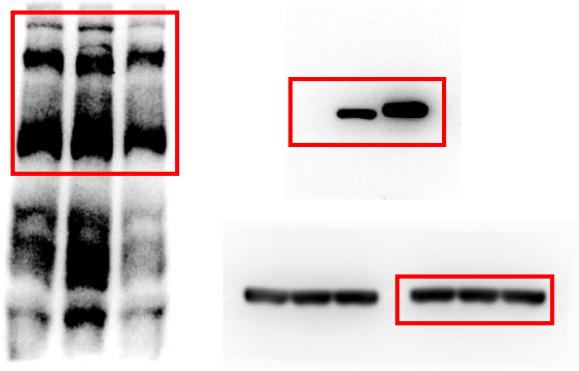

Figure 5B

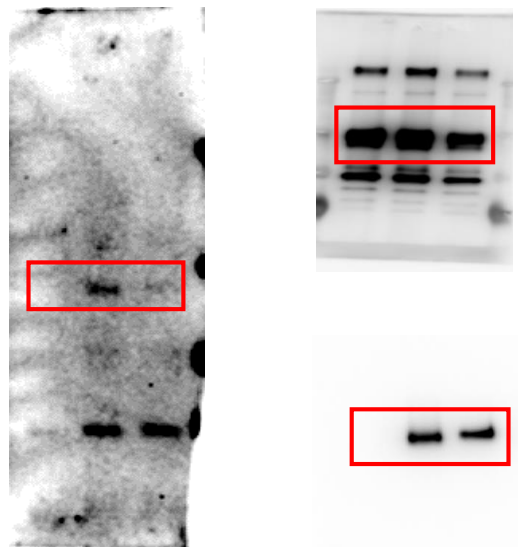

Figure 5E

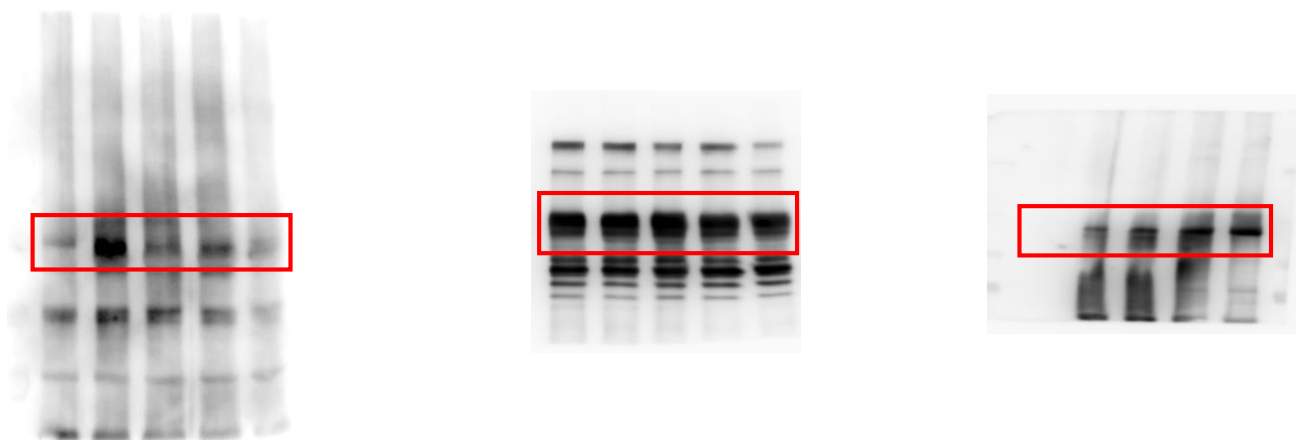

Figure 5F

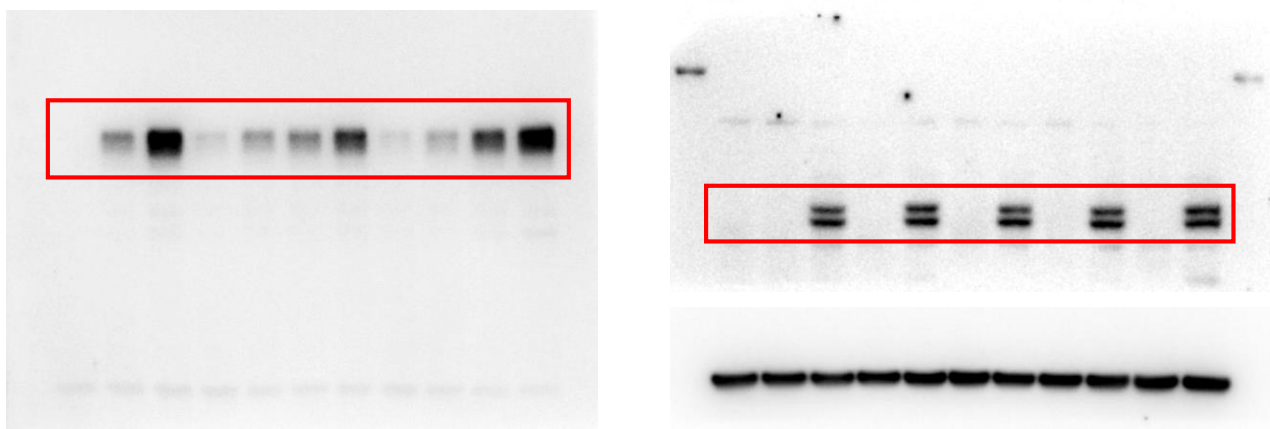

Figure 5G

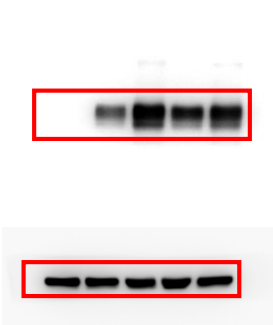

Figure 5H

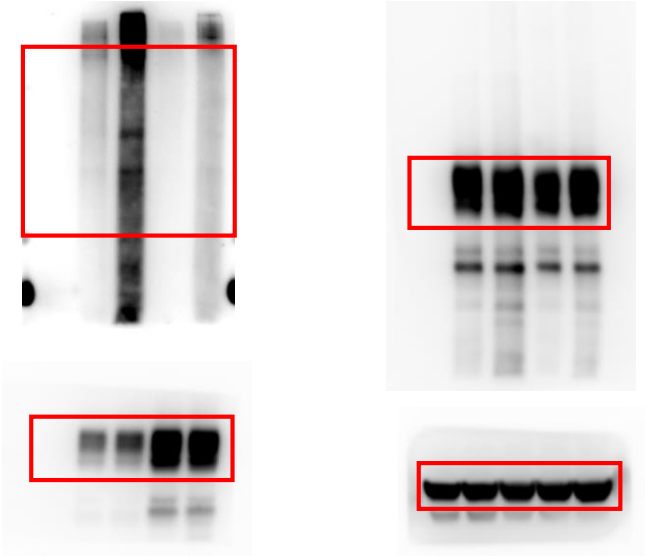

Supplement: EMMM-14-e15904-s009.pdf [file EMMM-14-e15904-s009.pdf]
