# Supplementary material
Source: PubMed Central journal article supplement (PMC9449599)
Supplement: EMMM-14-e15904-s010.pdf [file EMMM-14-e15904-s010.pdf]

# Expanded View Figures

## COVID-19 patient #8 Protein score: 33

```

1 MSSSSWLLLS LVAVTAAQST IEEQAKTFLD KFNHEAEDLF YQSSSLASWNY
51 NTNITEENVQ NNNNAGDKWS AFLKEQSTLA QMYPLEIQN LTVKLLQLAL
101 QQNGSSVLSE DKSKRLNTIL NTMSTIYSTG KVCNPNPQE CLLLEPGLNE
151 IMANSLDYNE RLWAWESWRS EVGQRLRPLY EEEVVLKNEM ARANHYEDYG
201 DYWRGDYEVN GVDGYDYSRG QLIEDVEHTF EEIKPLYEHL HAYVRAKLMN
251 AYPYSISPIG CLPAHLGLDM WGRFWTNLYS LTVFPQKPN IDVTDMVDQ
301 AWDAQRIFKE AEKFFVSVGL PMTQGFWEN SMLTDPGNVQ KAVCHPTAMD
351 LGKGFRLM CTKVTMDDFL TAHHEMGHIQ YDMAYAAQPF LLRNGANEGF
401 HEAVGEIMSL SAATPKHLKS IGLLSPDPQE DNETEINFL KQALITVGTL
451 PFTYMLEKWR WMVFKGEIIP DQMKKWMEM KREIVGVVEP VPHDETYCDP
501 ASLFHVSNDY SFIRYYTRTL YQFPQEQALC QAAKHEGPLH KCDISNSTEA
551 GQKLFNMLRL GKSEPTLAL ENNVGAKNMN VRPLLNLYFEP LFTWLKQDNK
601 NSFVWGSTDW SPYADQSIKV RISLSKALGD KAYEWNNDNM YLFRSSVAYA
651 MRQYFLKVKV QMILFGEEDV RVANLKPRIS FNFFVTAPKN VSDIIPRTEV
701 EKAIRMSRSR INDAFRLNND SLEFLGIQPT LGFPNQPPVS IWLIVFGVVM
751 GVIVGVIVIL IFTGIRDRKK KNKARSGENP YASIDISKGE NNPGFQNTDD
801 VQTSF
    
```

## COVID-19 patient #9 Protein score: 57

```

1 MSSSSWLLLS LVAVTAAQST IEEQAKTFLD KFNHEAEDLF YQSSSLASWNY
51 NTNITEENVQ NNNNAGDKWS AFLKEQSTLA QMYPLEIQN LTVKLQLAL
101 QQNGSSVLSE DKSKRLNTIL NTMSTIYSTG KVCNPNPQE CLLLEPGLNE
151 IMANSLDYNE RLWAWESWRS EVGQRLRPLY EEEVVLKNEM ARANHYEDYG
201 DYWRGDYEVN GVDGYDYSRG QLIEDVEHTF EEIKPLYEHL HAYVRAKLMN
251 AYPYSISPIG CLPAHLGLDM WGRFWTNLYS LTVFPQKPN IDVTDMVDQ
301 AWDAQRIFKE AEKFFVSVGL PMTQGFWEN SMLTDPGNVQ KAVCHPTAMD
351 LGKGFRLM CTKVTMDDFL TAHHEMGHIQ YDMAYAAQPF LLRNGANEGF
401 HEAVGEIMSL SAATPKHLKS IGLLSPDPQE DNETEINFL KQALITVGTL
451 PFTYMLEKWR WMVFKGEIIP DQMKKWMEM KREIVGVVEP VPHDETYCDP
501 ASLFHVSNDY SFIRYYTRTL YQFPQEQALC QAAKHEGPLH KCDISNSTEA
551 GQKLFNMLRL GKSEPTLAL ENNVGAKNMN VRPLLNLYFEP LFTWLKQDNK
601 NSFVWGSTDW SPYADQSIKV RISLSKALGD KAYEWNNDNM YLFRSSVAYA
651 MRQYFLKVKV QMILFGEEDV RVANLKPRIS FNFFVTAPKN VSDIIPRTEV
701 EKAIRMSRSR INDAFRLNND SLEFLGIQPT LGFPNQPPVS IWLIVFGVVM
751 GVIVGVIVIL IFTGIRDRKK KNKARSGENP YASIDISKGE NNPGFQNTDD
801 VQTSF
    
```

## COVID-19 patient #10 Protein score: 53

```

1 MSSSSWLLLS LVAVTAAQST IEEQAKTFLD KFNHEAEDLF YQSSSLASWNY
51 NTNITEENVQ NNNNAGDKWS AFLKEQSTLA QMYPLEIQN LTVKLLQLAL
101 QQNGSSVLSE DKSKRLNTIL NTMSTIYSTG KVCNPNPQE CLLLEPGLNE
151 IMANSLDYNE RLWAWESWRS EVGQRLRPLY EEEVVLKNEM ARANHYEDYG
201 DYWRGDYEVN GVDGYDYSRG QLIEDVEHTF EEIKPLYEHL HAYVRAKLMN
251 AYPYSISPIG CLPAHLGLDM WGRFWTNLYS LTVFPQKPN IDVTDMVDQ
301 AWDAQRIFKE AEKFFVSVGL PMTQGFWEN SMLTDPGNVQ KAVCHPTAMD
351 LGKGFRLM CTKVTMDDFL TAHHEMGHIQ YDMAYAAQPF LLRNGANEGF
401 HEAVGEIMSL SAATPKHLKS IGLLSPDPQE DNETEINFL KQALITVGTL
451 PFTYMLEKWR WMVFKGEIIP DQMKKWMEM KREIVGVVEP VPHDETYCDP
501 ASLFHVSNDY SFIRYYTRTL YQFPQEQALC QAAKHEGPLH KCDISNSTEA
551 GQKLFNMLRL GKSEPTLAL ENNVGAKNMN VRPLLNLYFEP LFTWLKQDNK
601 NSFVWGSTDW SPYADQSIKV RISLSKALGD KAYEWNNDNM YLFRSSVAYA
651 MRQYFLKVKV QMILFGEEDV RVANLKPRIS FNFFVTAPKN VSDIIPRTEV
701 EKAIRMSRSR INDAFRLNND SLEFLGIQPT LGFPNQPPVS IWLIVFGVVM
751 GVIVGVIVIL IFTGIRDRKK KNKARSGENP YASIDISKGE NNPGFQNTDD
801 VQTSF
    
```

## COVID-19 patient #11 Protein score: 41

```

1 MSSSSWLLLS LVAVTAAQST IEEQAKTFLD KFNHEAEDLF YQSSSLASWNY
51 NTNITEENVQ NNNNAGDKWS AFLKEQSTLA QMYPLEIQN LTVKLLQLAL
101 QQNGSSVLSE DKSKRLNTIL NTMSTIYSTG KVCNPNPQE CLLLEPGLNE
151 IMANSLDYNE RLWAWESWRS EVGQRLRPLY EEEVVLKNEM ARANHYEDYG
201 DYWRGDYEVN GVDGYDYSRG QLIEDVEHTF EEIKPLYEHL HAYVRAKLMN
251 AYPYSISPIG CLPAHLGLDM WGRFWTNLYS LTVFPQKPN IDVTDMVDQ
301 AWDAQRIFKE AEKFFVSVGL PMTQGFWEN SMLTDPGNVQ KAVCHPTAMD
351 LGKGFRLM CTKVTMDDFL TAHHEMGHIQ YDMAYAAQPF LLRNGANEGF
401 HEAVGEIMSL SAATPKHLKS IGLLSPDPQE DNETEINFL KQALITVGTL
451 PFTYMLEKWR WMVFKGEIIP DQMKKWMEM KREIVGVVEP VPHDETYCDP
501 ASLFHVSNDY SFIRYYTRTL YQFPQEQALC QAAKHEGPLH KCDISNSTEA
551 GQKLFNMLRL GKSEPTLAL ENNVGAKNMN VRPLLNLYFEP LFTWLKQDNK
601 NSFVWGSTDW SPYADQSIKV RISLSKALGD KAYEWNNDNM YLFRSSVAYA
651 MRQYFLKVKV QMILFGEEDV RVANLKPRIS FNFFVTAPKN VSDIIPRTEV
701 EKAIRMSRSR INDAFRLNND SLEFLGIQPT LGFPNQPPVS IWLIVFGVVM
751 GVIVGVIVIL IFTGIRDRKK KNKARSGENP YASIDISKGE NNPGFQNTDD
801 VQTSF
    
```

## COVID-19 patient #12 Protein score: 29

```

1 MSSSSWLLLS LVAVTAAQST IEEQAKTFLD KFNHEAEDLF YQSSSLASWNY
51 NTNITEENVQ NNNNAGDKWS AFLKEQSTLA QMYPLEIQN LTVKLLQLAL
101 QQNGSSVLSE DKSKRLNTIL NTMSTIYSTG KVCNPNPQE CLLLEPGLNE
151 IMANSLDYNE RLWAWESWRS EVGQRLRPLY EEEVVLKNEM ARANHYEDYG
201 DYWRGDYEVN GVDGYDYSRG QLIEDVEHTF EEIKPLYEHL HAYVRAKLMN
251 AYPYSISPIG CLPAHLGLDM WGRFWTNLYS LTVFPQKPN IDVTDMVDQ
301 AWDAQRIFKE AEKFFVSVGL PMTQGFWEN SMLTDPGNVQ KAVCHPTAMD
351 LGKGFRLM CTKVTMDDFL TAHHEMGHIQ YDMAYAAQPF LLRNGANEGF
401 HEAVGEIMSL SAATPKHLKS IGLLSPDPQE DNETEINFL KQALITVGTL
451 PFTYMLEKWR WMVFKGEIIP DQMKKWMEM KREIVGVVEP VPHDETYCDP
501 ASLFHVSNDY SFIRYYTRTL YQFPQEQALC QAAKHEGPLH KCDISNSTEA
551 GQKLFNMLRL GKSEPTLAL ENNVGAKNMN VRPLLNLYFEP LFTWLKQDNK
601 NSFVWGSTDW SPYADQSIKV RISLSKALGD KAYEWNNDNM YLFRSSVAYA
651 MRQYFLKVKV QMILFGEEDV RVANLKPRIS FNFFVTAPKN VSDIIPRTEV
701 EKAIRMSRSR INDAFRLNND SLEFLGIQPT LGFPNQPPVS IWLIVFGVVM
751 GVIVGVIVIL IFTGIRDRKK KNKARSGENP YASIDISKGE NNPGFQNTDD
801 VQTSF
    
```

## COVID-19 patient #13 Protein score: 37

```

1 MSSSSWLLLS LVAVTAAQST IEEQAKTFLD KFNHEAEDLF YQSSSLASWNY
51 NTNITEENVQ NNNNAGDKWS AFLKEQSTLA QMYPLEIQN LTVKLLQLAL
101 QQNGSSVLSE DKSKRLNTIL NTMSTIYSTG KVCNPNPQE CLLLEPGLNE
151 IMANSLDYNE RLWAWESWRS EVGQRLRPLY EEEVVLKNEM ARANHYEDYG
201 DYWRGDYEVN GVDGYDYSRG QLIEDVEHTF EEIKPLYEHL HAYVRAKLMN
251 AYPYSISPIG CLPAHLGLDM WGRFWTNLYS LTVFPQKPN IDVTDMVDQ
301 AWDAQRIFKE AEKFFVSVGL PMTQGFWEN SMLTDPGNVQ KAVCHPTAMD
351 LGKGFRLM CTKVTMDDFL TAHHEMGHIQ YDMAYAAQPF LLRNGANEGF
401 HEAVGEIMSL SAATPKHLKS IGLLSPDPQE DNETEINFL KQALITVGTL
451 PFTYMLEKWR WMVFKGEIIP DQMKKWMEM KREIVGVVEP VPHDETYCDP
501 ASLFHVSNDY SFIRYYTRTL YQFPQEQALC QAAKHEGPLH KCDISNSTEA
551 GQKLFNMLRL GKSEPTLAL ENNVGAKNMN VRPLLNLYFEP LFTWLKQDNK
601 NSFVWGSTDW SPYADQSIKV RISLSKALGD KAYEWNNDNM YLFRSSVAYA
651 MRQYFLKVKV QMILFGEEDV RVANLKPRIS FNFFVTAPKN VSDIIPRTEV
701 EKAIRMSRSR INDAFRLNND SLEFLGIQPT LGFPNQPPVS IWLIVFGVVM
751 GVIVGVIVIL IFTGIRDRKK KNKARSGENP YASIDISKGE NNPGFQNTDD
801 VQTSF
    
```

## Healthy control #5 Protein score: 15

```

1 MSSSSWLLLS LVAVTAAQST IEEQAKTFLD KFNHEAEDLF YQSSSLASWNY
51 NTNITEENVQ NNNNAGDKWS AFLKEQSTLA QMYPLEIQN LTVKLLQLAL
101 QQNGSSVLSE DKSKRLNTIL NTMSTIYSTG KVCNPNPQE CLLLEPGLNE
151 IMANSLDYNE RLWAWESWRS EVGQRLRPLY EEEVVLKNEM ARANHYEDYG
201 DYWRGDYEVN GVDGYDYSRG QLIEDVEHTF EEIKPLYEHL HAYVRAKLMN
251 AYPYSISPIG CLPAHLGLDM WGRFWTNLYS LTVFPQKPN IDVTDMVDQ
301 AWDAQRIFKE AEKFFVSVGL PMTQGFWEN SMLTDPGNVQ KAVCHPTAMD
351 LGKGFRLM CTKVTMDDFL TAHHEMGHIQ YDMAYAAQPF LLRNGANEGF
401 HEAVGEIMSL SAATPKHLKS IGLLSPDPQE DNETEINFL KQALITVGTL
451 PFTYMLEKWR WMVFKGEIIP DQMKKWMEM KREIVGVVEP VPHDETYCDP
501 ASLFHVSNDY SFIRYYTRTL YQFPQEQALC QAAKHEGPLH KCDISNSTEA
551 GQKLFNMLRL GKSEPTLAL ENNVGAKNMN VRPLLNLYFEP LFTWLKQDNK
601 NSFVWGSTDW SPYADQSIKV RISLSKALGD KAYEWNNDNM YLFRSSVAYA
651 MRQYFLKVKV QMILFGEEDV RVANLKPRIS FNFFVTAPKN VSDIIPRTEV
701 EKAIRMSRSR INDAFRLNND SLEFLGIQPT LGFPNQPPVS IWLIVFGVVM
751 GVIVGVIVIL IFTGIRDRKK KNKARSGENP YASIDISKGE NNPGFQNTDD
801 VQTSF
    
```

## Healthy control #10 Protein score: 29

```

1 MSSSSWLLLS LVAVTAAQST IEEQAKTFLD KFNHEAEDLF YQSSSLASWNY
51 NTNITEENVQ NNNNAGDKWS AFLKEQSTLA QMYPLEIQN LTVKLQLAL
101 QQNGSSVLSE DKSKRLNTIL NTMSTIYSTG KVCNPNPQE CLLLEPGLNE
151 IMANSLDYNE RLWAWESWRS EVGQRLRPLY EEEVVLKNEM ARANHYEDYG
201 DYWRGDYEVN GVDGYDYSRG QLIEDVEHTF EEIKPLYEHL HAYVRAKLMN
251 AYPYSISPIG CLPAHLGLDM WGRFWTNLYS LTVFPQKPN IDVTDMVDQ
301 AWDAQRIFKE AEKFFVSVGL PMTQGFWEN SMLTDPGNVQ KAVCHPTAMD
351 LGKGFRLM CTKVTMDDFL TAHHEMGHIQ YDMAYAAQPF LLRNGANEGF
401 HEAVGEIMSL SAATPKHLKS IGLLSPDPQE DNETEINFL KQALITVGTL
451 PFTYMLEKWR WMVFKGEIIP DQMKKWMEM KREIVGVVEP VPHDETYCDP
501 ASLFHVSNDY SFIRYYTRTL YQFPQEQALC QAAKHEGPLH KCDISNSTEA
551 GQKLFNMLRL GKSEPTLAL ENNVGAKNMN VRPLLNLYFEP LFTWLKQDNK
601 NSFVWGSTDW SPYADQSIKV RISLSKALGD KAYEWNNDNM YLFRSSVAYA
651 MRQYFLKVKV QMILFGEEDV RVANLKPRIS FNFFVTAPKN VSDIIPRTEV
701 EKAIRMSRSR INDAFRLNND SLEFLGIQPT LGFPNQPPVS IWLIVFGVVM
751 GVIVGVIVIL IFTGIRDRKK KNKARSGENP YASIDISKGE NNPGFQNTDD
801 VQTSF
    
```

## Healthy control #6 (No ACE2 detected)

```

1 MSSSSWLLLS LVAVTAAQST IEEQAKTFLD KFNHEAEDLF YQSSSLASWNY
51 NTNITEENVQ NNNNAGDKWS AFLKEQSTLA QMYPLEIQN LTVKLLQLAL
101 QQNGSSVLSE DKSKRLNTIL NTMSTIYSTG KVCNPNPQE CLLLEPGLNE
151 IMANSLDYNE RLWAWESWRS EVGQRLRPLY EEEVVLKNEM ARANHYEDYG
201 DYWRGDYEVN GVDGYDYSRG QLIEDVEHTF EEIKPLYEHL HAYVRAKLMN
251 AYPYSISPIG CLPAHLGLDM WGRFWTNLYS LTVFPQKPN IDVTDMVDQ
301 AWDAQRIFKE AEKFFVSVGL PMTQGFWEN SMLTDPGNVQ KAVCHPTAMD
351 LGKGFRLM CTKVTMDDFL TAHHEMGHIQ YDMAYAAQPF LLRNGANEGF
401 HEAVGEIMSL SAATPKHLKS IGLLSPDPQE DNETEINFL KQALITVGTL
451 PFTYMLEKWR WMVFKGEIIP DQMKKWMEM KREIVGVVEP VPHDETYCDP
501 ASLFHVSNDY SFIRYYTRTL YQFPQEQALC QAAKHEGPLH KCDISNSTEA
551 GQKLFNMLRL GKSEPTLAL ENNVGAKNMN VRPLLNLYFEP LFTWLKQDNK
601 NSFVWGSTDW SPYADQSIKV RISLSKALGD KAYEWNNDNM YLFRSSVAYA
651 MRQYFLKVKV QMILFGEEDV RVANLKPRIS FNFFVTAPKN VSDIIPRTEV
701 EKAIRMSRSR INDAFRLNND SLEFLGIQPT LGFPNQPPVS IWLIVFGVVM
751 GVIVGVIVIL IFTGIRDRKK KNKARSGENP YASIDISKGE NNPGFQNTDD
801 VQTSF
    
```

## Healthy control #7 (No ACE2 detected)

```

1 MSSSSWLLLS LVAVTAAQST IEEQAKTFLD KFNHEAEDLF YQSSSLASWNY
51 NTNITEENVQ NNNNAGDKWS AFLKEQSTLA QMYPLEIQN LTVKLLQLAL
101 QQNGSSVLSE DKSKRLNTIL NTMSTIYSTG KVCNPNPQE CLLLEPGLNE
151 IMANSLDYNE RLWAWESWRS EVGQRLRPLY EEEVVLKNEM ARANHYEDYG
201 DYWRGDYEVN GVDGYDYSRG QLIEDVEHTF EEIKPLYEHL HAYVRAKLMN
251 AYPYSISPIG CLPAHLGLDM WGRFWTNLYS LTVFPQKPN IDVTDMVDQ
301 AWDAQRIFKE AEKFFVSVGL PMTQGFWEN SMLTDPGNVQ KAVCHPTAMD
351 LGKGFRLM CTKVTMDDFL TAHHEMGHIQ YDMAYAAQPF LLRNGANEGF
401 HEAVGEIMSL SAATPKHLKS IGLLSPDPQE DNETEINFL KQALITVGTL
451 PFTYMLEKWR WMVFKGEIIP DQMKKWMEM KREIVGVVEP VPHDETYCDP
501 ASLFHVSNDY SFIRYYTRTL YQFPQEQALC QAAKHEGPLH KCDISNSTEA
551 GQKLFNMLRL GKSEPTLAL ENNVGAKNMN VRPLLNLYFEP LFTWLKQDNK
601 NSFVWGSTDW SPYADQSIKV RISLSKALGD KAYEWNNDNM YLFRSSVAYA
651 MRQYFLKVKV QMILFGEEDV RVANLKPRIS FNFFVTAPKN VSDIIPRTEV
701 EKAIRMSRSR INDAFRLNND SLEFLGIQPT LGFPNQPPVS IWLIVFGVVM
751 GVIVGVIVIL IFTGIRDRKK KNKARSGENP YASIDISKGE NNPGFQNTDD
801 VQTSF
    
```

## Healthy control #8 (No ACE2 detected)

```

1 MSSSSWLLLS LVAVTAAQST IEEQAKTFLD KFNHEAEDLF YQSSSLASWNY
51 NTNITEENVQ NNNNAGDKWS AFLKEQSTLA QMYPLEIQN LTVKLLQLAL
101 QQNGSSVLSE DKSKRLNTIL NTMSTIYSTG KVCNPNPQE CLLLEPGLNE
151 IMANSLDYNE RLWAWESWRS EVGQRLRPLY EEEVVLKNEM ARANHYEDYG
201 DYWRGDYEVN GVDGYDYSRG QLIEDVEHTF EEIKPLYEHL HAYVRAKLMN
251 AYPYSISPIG CLPAHLGLDM WGRFWTNLYS LTVFPQKPN IDVTDMVDQ
301 AWDAQRIFKE AEKFFVSVGL PMTQGFWEN SMLTDPGNVQ KAVCHPTAMD
351 LGKGFRLM CTKVTMDDFL TAHHEMGHIQ YDMAYAAQPF LLRNGANEGF
401 HEAVGEIMSL SAATPKHLKS IGLLSPDPQE DNETEINFL KQALITVGTL
451 PFTYMLEKWR WMVFKGEIIP DQMKKWMEM KREIVGVVEP VPHDETYCDP
501 ASLFHVSNDY SFIRYYTRTL YQFPQEQALC QAAKHEGPLH KCDISNSTEA
551 GQKLFNMLRL GKSEPTLAL ENNVGAKNMN VRPLLNLYFEP LFTWLKQDNK
601 NSFVWGSTDW SPYADQSIKV RISLSKALGD KAYEWNNDNM YLFRSSVAYA
651 MRQYFLKVKV QMILFGEEDV RVANLKPRIS FNFFVTAPKN VSDIIPRTEV
701 EKAIRMSRSR INDAFRLNND SLEFLGIQPT LGFPNQPPVS IWLIVFGVVM
751 GVIVGVIVIL IFTGIRDRKK KNKARSGENP YASIDISKGE NNPGFQNTDD
801 VQTSF
    
```

## Healthy control #9 (No ACE2 detected)

```

1 MSSSSWLLLS LVAVTAAQST IEEQAKTFLD KFNHEAEDLF YQSSSLASWNY
51 NTNITEENVQ NNNNAGDKWS AFLKEQSTLA QMYPLEIQN LTVKLLQLAL
101 QQNGSSVLSE DKSKRLNTIL NTMSTIYSTG KVCNPNPQE CLLLEPGLNE
151 IMANSLDYNE RLWAWESWRS EVGQRLRPLY EEEVVLKNEM ARANHYEDYG
201 DYWRGDYEVN GVDGYDYSRG QLIEDVEHTF EEIKPLYEHL HAYVRAKLMN
251 AYPYSISPIG CLPAHLGLDM WGRFWTNLYS LTVFPQKPN IDVTDMVDQ
301 AWDAQRIFKE AEKFFVSVGL PMTQGFWEN SMLTDPGNVQ KAVCHPTAMD
351 LGKGFRLM CTKVTMDDFL TAHHEMGHIQ YDMAYAAQPF LLRNGANEGF
401 HEAVGEIMSL SAATPKHLKS IGLLSPDPQE DNETEINFL KQALITVGTL
451 PFTYMLEKWR WMVFKGEIIP DQMKKWMEM KREIVGVVEP VPHDETYCDP
501 ASLFHVSNDY SFIRYYTRTL YQFPQEQALC QAAKHEGPLH KCDISNSTEA
551 GQKLFNMLRL GKSEPTLAL ENNVGAKNMN VRPLLNLYFEP LFTWLKQDNK
601 NSFVWGSTDW SPYADQSIKV RISLSKALGD KAYEWNNDNM YLFRSSVAYA
651 MRQYFLKVKV QMILFGEEDV RVANLKPRIS FNFFVTAPKN VSDIIPRTEV
701 EKAIRMSRSR INDAFRLNND SLEFLGIQPT LGFPNQPPVS IWLIVFGVVM
751 GVIVGVIVIL IFTGIRDRKK KNKARSGENP YASIDISKGE NNPGFQNTDD
801 VQTSF
    
```

**Figure EV1. ACE2 proteins are detected in the serum exosomes of all six COVID-19 patients.**  
 The identified peptide sequences (red color) of endogenous ACE2 by mass spectrometry analyses using exosomes isolated from the sera of six COVID-19 patients and six healthy controls (Cohort #3). All six COVID-19 patients but only two of six healthy controls showed exosomal ACE2 proteins in the serum exomes. Exosomes were sequentially isolated using ExoQuick kits and then ExoQuick ULTRA columns. Exosomes were further purified by immunoprecipitation using a combination of anti-CD9, anti-CD63, and anti-CD81 magnetic beads. The protein score is the sum of the highest ions score of MS/MS search for each distinct peptide.

## A UBR4 protein sequence

1 MATSGGEEAA AAAPAPGTPA TGADTTPGWE VAVRPLLSAS YSAFEMKELP  
 51 QLVASVIESE SEILHHEKQY EPFYSFVVAL SHYITTVCS LIPRNLQKSV  
 101 AAACKVLIIEF SLLRLENPE ACASVQKHLLI LLIKGLCTCG SRLDRTEIIT  
 151 FTAMMKSARK PQTVKTLSDV EDQKELASPV SPELRQKEVQ MNFLNQLTSV  
 201 FNPRTVASQP ISTQTLVEGE NDEQSSDQQA SAIKTKNVFI AQNVASLQEL  
 251 GGSEKLLRVC LNLPLYFLRY NRFQDAVLAN SFFIMPATVA DATAVRNGFH  
 301 SLVIDVTMAL DTLSLPVEFP LNPRLQDVT VLSLSCLYAG VSVATCMAIL  
 351 HVGSAQQVVRT GSTSSKEDDY ESDAATIVQK CLEIYDMIGQ AISSSRRAGG  
 401 EHYQNFQLL AWCLLNSLFL ILNLSPTALA DKGKEDPLA ALRVDRILSR  
 451 TKEGVSPPKL GPGKGHQGFG VLSVILANHA IKLLTSLFQD LQVEALHKGW  
 501 ETDGPPAALS IMAQSTSIQR IQRLIDSVP L MNLLTLLST SYRKACVLQR  
 551 QRKGMSSDA SASDSTNYE EDDFSSTEED SSQDDSEPI LGWAFQETIS  
 601 PSKEKAAPP PPPPPLESS PRVKSQKQA PGEKGNILAS RKDPELFLGL  
 651 ASNILNFITS SMLNSRNNFI RNYLSVLSLE HHMATLASII KEVDKDLKLG  
 701 SSDEEFAAAL YHFNHSLVTS DLQSPNLQNT LLQQLGVAFP SEGWPPLYIH  
 751 PQSLSVLSRL LLIHQHKASA QGDPDVPECL KVWDRFLSTM KQNALQGVVP  
 801 SETEDLNVEH LQMLLLIFHN FTETGRRAIL SLFVQIQEL SVNMDAQMRF  
 851 VPLILARLLL IFDYLLHQYS KAPVYLFEQV QHNLLSPPFG WASGSDSNS  
 901 RRATTPLYHG FKEVEENWSK HFSSDAVPHF RFYCVLSPEA SEDDLNRLDS  
 951 VACDVLFSKL VKYDELIAAL TALLAAGSQL DTVRRKENKN VTALEACALQ  
 1001 YYFLILWRIL GILPPSKTYI NQLSMNSPEM SECILHTRL WSSRLRISY  
 1051 VNWIKDHLIK QGMKAHEASS LLELASTTIC SSVKYDVEIV EEFYFARQISS  
 1101 FCSIDCTTIL QLHEIPSLQS IYTLDAIAISK VQVSLDEHFS KMAAETDPHK  
 1151 SSEITKNLLP ATLQLIDTYA SFTTARXLLQN FNEEGTEKP SKEALQGFAA  
 1201 VLAIGSSRCK ANTLGPTLVQ NLPSSVQTV C ESWNININTNE FPNIGSWRNA  
 1251 FANDTIPSES YISAVQAAHL GTLCSQSLPL AASLKHTLLS LVRLTGDLIV  
 1301 WSDENMPPQV IRTLLPLLE SSTESVAEIS SNSLERILGP AESDEFLAVR  
 1351 YEKLITGCYN ILANHNDPNS LQYLEKLEEC SQARKAMEEF  
 1401 FSDSGELVQI MMATANENLS AKFCNRVLKF PTKLFQLTEK SPNPSLLHLC  
 1451 GSLAQLACVE PVRLQAWLFR MTTSPPKDSD QLDVIQENRQ LLQLLTYIV  
 1501 RENSQVGEV CAVLLGTLTP MATEMLANG GTGFPPELMVV MATLASAGQG  
 1551 AGHLQLHNA VDWLSRCKKY LSQKNVVEKL NANVMHGKHV MILECTCHIM  
 1601 SYLADVTNAL SQSNGQGPSH LSVDGEEAII EVDSDWVEEL AVEEDSQAE  
 1651 DSDEDSLCKN LCTFTITQKE FMNQHWHYCH TCKMVDGVGV CTVCARVCHK  
 1701 DHEISYAKYG SFFCDGCAKE DGSLCALVLR TPSSGMSSTM KESAFQSEPR  
 1751 ISELSVRHAS TSSPADKAV TISDGVVADE EKPKKSSLCR TVEGCRELEQ  
 1801 NQANFSFAPL VLDMLNFLMD AIQTNFQQAS AVGSSSRAQQ ALSELHTVEK  
 1851 AVEMTDQLMV PTLGSGEGAF ENVMRMYSGD QGQTIRQLIS AHVLRKVAAC  
 1901 VLSSPHGRRL HLAVSHEK GK ITVQLSALL KQADSSKRKL TLRTHASAPV  
 1951 PFTVLSLTGN PCKEDYLAVC GLKDCHVLT F SSSGSVSDHL VHPQLATGN  
 2001 FIIKAVWLPG SQTELAIVTA DFKIYDLCV DALSPTFYFL LPSSKIROVT  
 2051 FLFNEEGKNI IVIMSSAGYI YTLQMEEASS AQQGPFYVFN VLEINHEDLK  
 2101 DSNQVAGGG VSVYVSHVQL MLFFSYCQKG SFAATISRRT LEVLQLFPIN  
 2151 IKSSNGGSKT SPALCQWSEV MNHPLVCCV QQTGVPLVV MVKPDTFLIQ  
 2201 EIKTLPKAK IQDMVAIRHT ACNEQQRTM ILLCEDGSLR IYMANVENTS  
 2251 YWLQPSLQPS SVISIMKPV RKRKTATITR TSSQVTFPID FFEHNQQLTD  
 2301 VEFGGNDLLQ VYNAQQIKHR LNSTGMVYAN TKPGGFTEI SNNNTMVMVT  
 2351 GMRIQIGTQA IERAPSYIEI FGRIMQLNLS RSRWFDFPPT REEALQADKK  
 2401 LNLFIGASVD PAGVTMIDAV KIYGKTEQF GWPDEPPEEF PSASVSNICP  
 2451 SNLNQSNGTG DSDSAAPTTT SGTVLERLVV SSLEALESCF AVGP1IEKER  
 2501 NKNAAQELAT LLLSLPAPAS VQOQSKSLLA SLHTSRAYH SHKDQALLSK  
 2551 AVQCLNTSSK EGKDLDEPVF QRLVITARS I AIMRPNLVH FTESKLPQME  
 2601 TEGMDEGKEP QKQLEGDCS FITQLVNHFW KLHASKPKNA FLAPACLPGL  
 2651 THIEATVNAL VDIHGYCTC ELDICINTASK IYMQMLLCPD PAVSFSCQA  
 2701 LIRVLRPRNK RRHVTLPSSP RSNTPMGDK DDDDDDADEK MQSSGIPNGG  
 2751 HIRQESQEQS EVDHGDFFEMV SESMVLETA E NVNNGNPSPL EALLAGAEF  
 2801 PMLDIPPPA DDETMVELAI ALSLQDQOQ SSSSALGLQS LGLSGQAPSS  
 2851 SSLDAGTSLD TTASAPASDD EGSTAATDGS TLRTPADHG GSVGSESGGS  
 2901 AVDSVAGEHS VSGRSSAYGD ATAEGHPAG GSVSSSTGAI STTTGHQEGD

2951 GSEGEGET EGDVHTSNRL HMVRLMLLER LLQTLPLRN VGVRAIPYM  
 3001 QVILMLTTDL DGEDEKDKGA LDNLLSQLIA ELGMKDDVS KKNERSALNE  
 3051 VHLVVMRLLS VFMSRTKSGS KSSICESSSL ISSATAAALL SSGAVDYCLH  
 3101 VLKSLLEYWK SQQNDEEPPVA TSQLLKPHTT SSPPDMSPPF LRQYVKGHAA  
 3151 DVFEAYTQLL TEMVLRPLPYQ IKKITDINSR IPPPVFDHWS FYFLSEYLM1  
 3201 QQTFVVRQV RKLLIFIGCS KEKVRQLRDL HTLDSHVRGI KKLLEEQGI  
 3251 LRASVVTASS GSALQYDTLI SLMEHLKACA EIAAQRITNW QKFCIKDDSV  
 3301 LYFLLQVSFL VDEGVSPVLL QLLSCLCGS KVLAAALASS GSSASSSSA  
 3351 PVAASSGQAT TQSKSSSTKS KKEEKEKED GETSGSQEDQ LCTALVNQLN  
 3401 KFADKETLIQ FLRCFLLESN SSSVRWQAH LTLHIYRNS KSQQLLDDL  
 3451 MWSIWPELPA YGRKAAQFVD LLGYFSLKTP QTEKKLKEYS QKAVEILRTQ  
 3501 NHILTNHPNS NIYNTLSGLV EFDGYLESD PCLVCNNEV PFCYIKLSSI  
 3551 KVDTRYTTQ QVVKLIGSHT ISKVTVKIGD LKRTKRVRTI NLYNNRTVQ  
 3601 AIVELKNKFA RWHKAKKVQL TPGQTEVKID LPLPIVASNL MIEFADFEN  
 3651 YQASTETLQC PRCSASVPAN PGVCGNGEN VYQCHKRSI NYDEKDPFLC  
 3701 NACGFCKYAR FDFMLYKPC CAVDPIENEE DRKKAVSNIN TLLDKADRVY  
 3751 HQLMGRHPQL ENLLCKVNEA APEKPDQDSG TAGGISSTSA SNRYILQLA  
 3801 QEYCGDCNNS FDELSKIIQK YFASRKELE DLQQRREAT KVRNYSVPT  
 3851 FTASQYRALS VLGCCHTSST KCYGCASAVT EHCITLLRAL ATNPALRHIL  
 3901 VSQGLIRELF DYNLRRGAAA MREVRQLMC LLTRDNPEAT QMNDLIGK  
 3951 VSTALGHWA NPDASSLQY EMLLTDSDS KEDSCWELRL RCALSFLMA  
 4001 VNIKTPTVVE NITLMCLRL QKLIKPPAPT SKKNKDVPE ALTVKPYCN  
 4051 EIHQAQLWL KRDPKASYDA WKKCLPIRGI DNGKAPSKS ELRHLYLTK  
 4101 YVWRWKQFLS RRGKTRSPLD LKLGHNNWLR QVLETPATQA ARQAACTIVE  
 4151 ALATIPSRKQ QVLDLLTSYL DELSIAECA AEYLALYQKL ITSAAHKVYL  
 4201 AARGVLPYVG NLITKEIARL LALEAATLST DLQOQYALKS TLGLSSFVE  
 4251 VESIKRHFKS RLVGTVLNGY LCLRKLIVQR TKLIDETQDM LLEMLDMMT  
 4301 GTESETKAFM AVCIETAKRY NLDYRTPVF IFERLCSIIY PEENEVTEFF  
 4351 VTLEKDPQOE DFLQGRMPGN PYSSNEPGIG PLMRDIKNI CQDCDLVALL  
 4401 EDDSGMELLV NNIISLDLP VAEVYKVVWC TTNEGEPMRI VYMRGLLGD  
 4451 ATEEFIESLD STTDEEED EYVKMAGVMA CQGGLECLMN RLAGIRDFKQ  
 4501 GRHLLTVLLK LFSYCVKVKV NRQQLVKLEM NTLNVMGLT LNALVAEQS  
 4551 KDSGGAVAE QVLSIMEIIL DESNAEPLSE DKGNLLTGD KDQVLMLLDQ  
 4601 INSTFVRSNP SVLQGLLRII VAEVYKVVWC MKILVERFKP YCNFQYDED  
 4651 HSGDDKVFLD CFCKIAAGIK NNSNGHLKD LILQKGITQN ALDYMKKHIP  
 4701 SAKNLDADIW KKFSLRPAIP FILRLLRGLA IQHPGTQVLI GTDISPNLHK  
 4751 LEQVSSDEGI GCLAENLEA LREHPVNVK IDAARRETRA EKRRMAMAMR  
 4801 QKALGTLMGT TNEKGQVTK TALLKQMEEL IEEFGLTCCI CREGYKQFPT  
 4851 KVLGIYFTK RVALEEMENK PRKQOQYSTV SHFNIVHYDC HLAAVRLARG  
 4901 REEWESAAAL NANTKCNGLL PWWGPHVPS AFATCLARHN TYLQECTQGR  
 4951 EPTYQLNIHD IKLLFLRFAM EQSFSADTGG GGRESNIHLI PYIHTVLYV  
 5001 LNTTRATSRE EKNLQGFLEQ PKEKRVESAF EVDGPYFTV LALHILPPEQ  
 5051 WRATRVIEIL RLLVTSQARA VAPGGATRLT DKAVKDYSAV RSSLFWALV  
 5101 DLIYNMFKKV PTSNTEGGWS CSLAEYRHN DMPIYEAADK ALKTFQEEFM  
 5151 PVETFSFELD VAGLSEITD PESFLKDLLN SVP

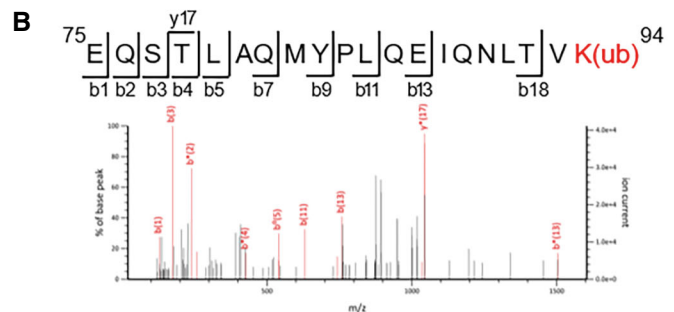

**Figure EV2.** UBR4 is identified as an ACE2-interacting protein by mass spectrometry.

A The identified peptide sequences (red color) of endogenous UBR4 by mass spectrometry analyses using ACE2 immunocomplexes. ACE2-overexpressing HEK293T cells were treated with the proteasome inhibitor MG132 (25  $\mu$ M) for 2 h.

B Besides Lys26, Lys112, and Lys114 residues, Lys94 residue was also identified as an ACE2 ubiquitination site. Mass spectrometry analysis of the ACE2 peptide containing the ubiquitination residue Lys94 from ACE2-transfected HEK293T cells treated with MG132.



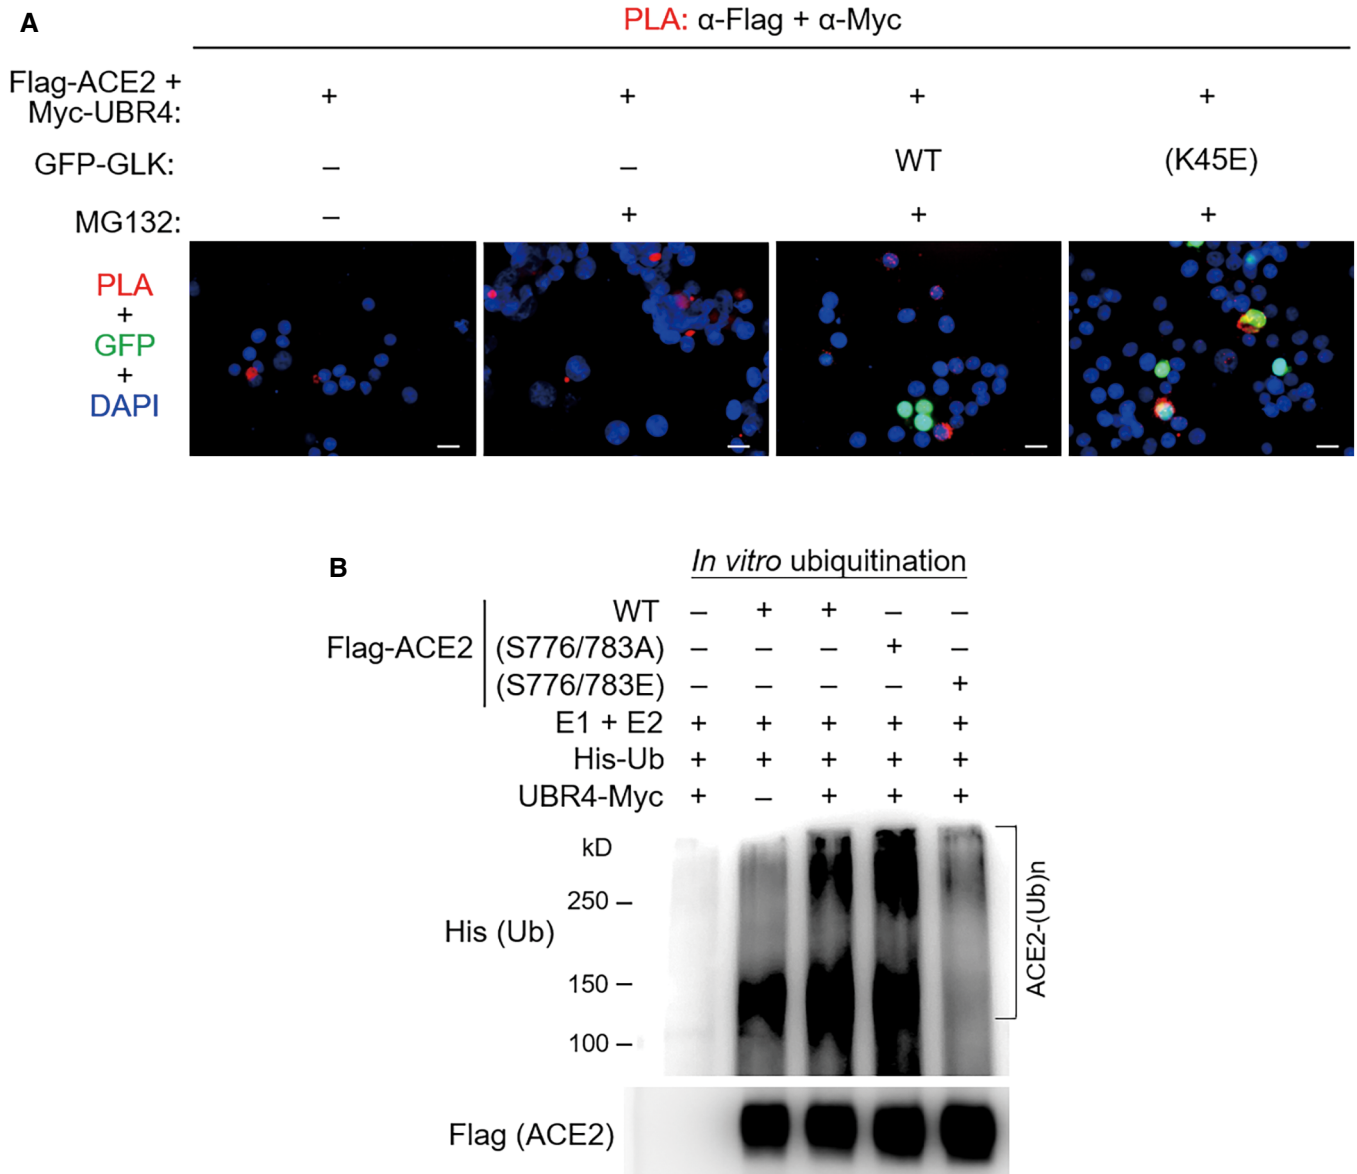

**Figure EV3. GLK-induced ACE2 phosphorylation blocks the ACE2-UBR4 interaction and subsequent ACE2 ubiquitination.**

**A** *In situ* PLA assays of the interaction between Flag-tagged ACE2 and Myc-tagged UBR4 proteins in HEK293T cells. Cells were co-transfected with Flag-ACE2 and Myc-UBR4 plus either GFP-GLK (green) or GFP-GLK (K45E) kinase-dead mutant (green) plasmids. Nuclei were stained with DAPI. Red dots represent direct interaction signals. Yellow color represents the co-existence of PLA signal (red) and GLK (K45E) mutant protein (green). Original magnification, ×200. Scale bars, 20 μm.

**B** *In vitro* ubiquitination assays using Myc-tagged UBR4 and Flag-tagged ACE2 proteins with E1 ubiquitin-activating enzyme, E2 ubiquitin-conjugating enzyme, and His-tagged ubiquitin. ACE2 ubiquitination and ACE2 were detected by immunoblotting with anti-His and anti-Flag antibodies, respectively. Data shown are representative results of three independent experiments.

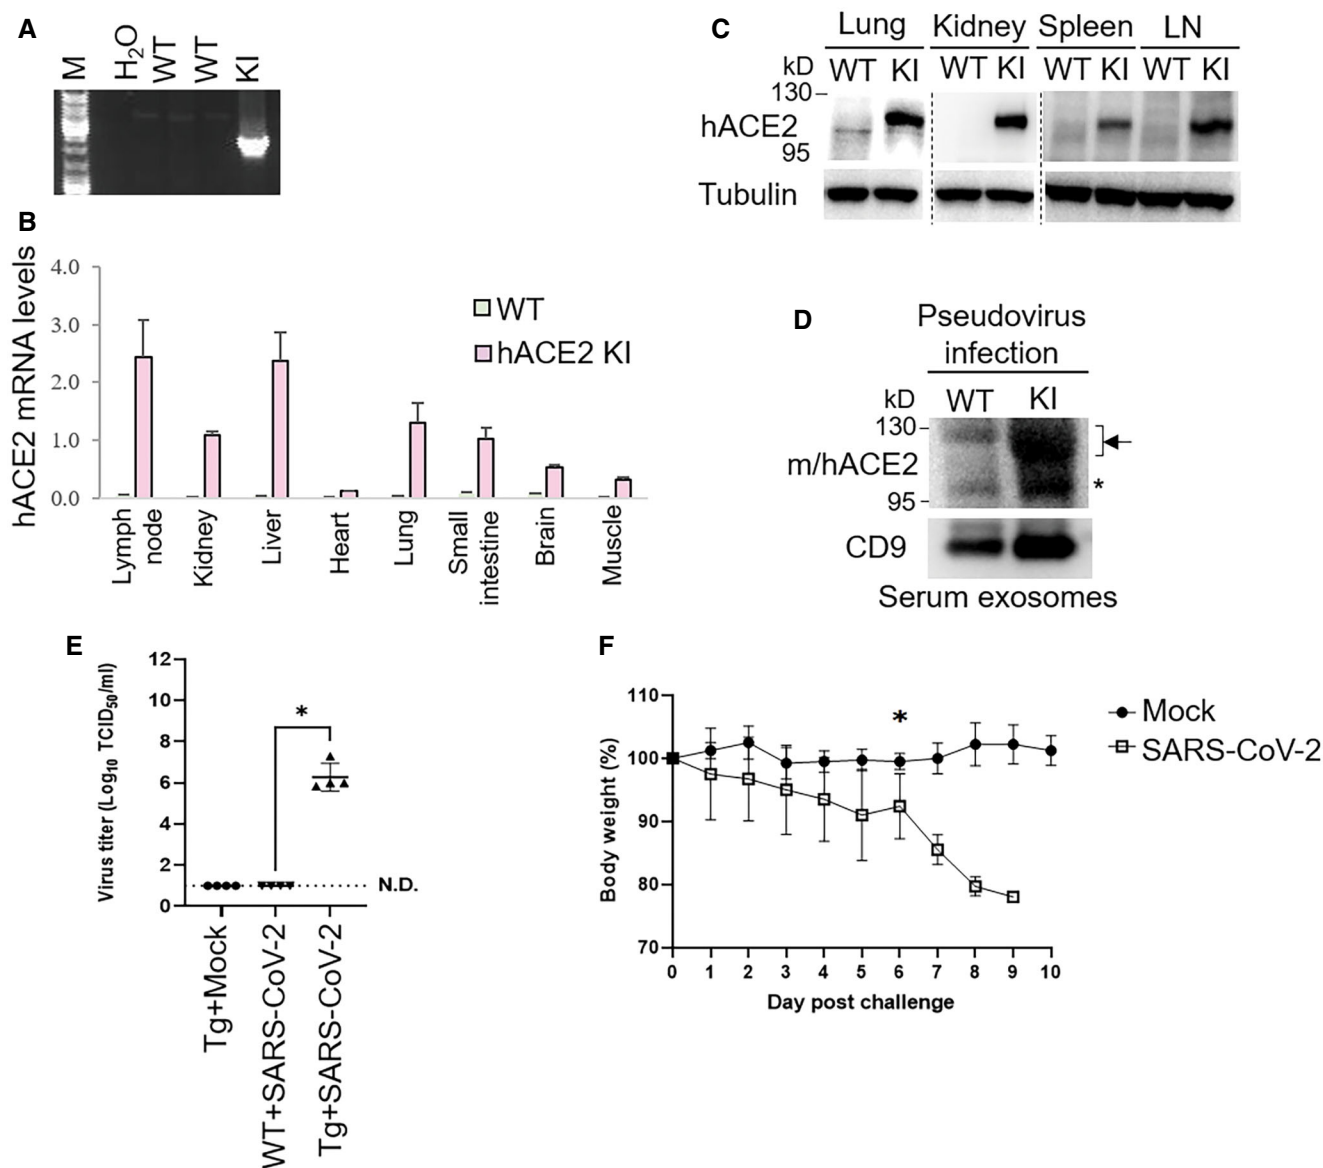

**Figure EV4. Infection of hACE2 knockin mice and EF1 $\alpha$ -hACE2 transgenic mice with SARS-CoV-2 pseudovirus or live SARS-CoV-2.**

**A** PCR analyses of hACE2 knockin allele in the genomic DNA from mouse tails. The PCR product of the 2,379-bp band indicates the hACE2 knockin allele.

**B** Real-time PCR analyses of knockin human ACE2 (hACE2) mRNA levels in the lymph nodes, kidneys, liver, heart, lungs, small intestine, brain, and muscle from wild-type or hACE2 KI mice. The human ACE2 mRNA levels were normalized to mouse GAPDH mRNA levels.  $n = 2$  (technical replicates) per group.

**C** Immunoblotting analyses of hACE2, tubulin, and human ACE2 proteins in the lungs, kidneys, spleen, and lymph nodes of wild-type and hACE2 KI mice.

**D** Immunoblotting of hACE2, GLK, and CD9 proteins in the exosomes isolated from the sera of the SARS-CoV-2 pseudovirus-infected mice. Exosomes were isolated sequentially using ExoQuick kits and then ExoQuick ULTRA columns. Arrowheads denote glycosylated hACE2 proteins; asterisk denotes unglycosylated hACE2 proteins.

**E, F** EF1 $\alpha$ -hACE2 Tg and wild-type mice were infected intranasally with  $2 \times 10^5$  pfu of live SARS-CoV-2.  $n = 4$  (biological replicates) per group. EF1 $\alpha$ -hACE2 Tg mice were treated intranasally with PBS (Mock) as controls. On day 3 postinfection, the mice were sacrificed, and the lung tissues were homogenized for the TCID<sub>50</sub> assay (E). The survival rate of EF1 $\alpha$ -hACE2 Tg mice challenged with live SARS-CoV2 was monitored (F). WT, wild-type mice; KI, hACE2 knockin mice; Tg, EF1 $\alpha$ -hACE2 transgenic mice. The number of infected mice was less than 3 from day 7 due to deaths; thus, the statistical analysis of panel F was only performed on data up to day 6 postinfection.

Data information: In (B), data are presented as means  $\pm$  SD. In (E), data are presented as means  $\pm$  SEM. \* $P$ -value < 0.05 (Kruskal–Wallis test). In (F), data are presented as means  $\pm$  SEM. \* $P$ -value < 0.05 (Mann–Whitney test).

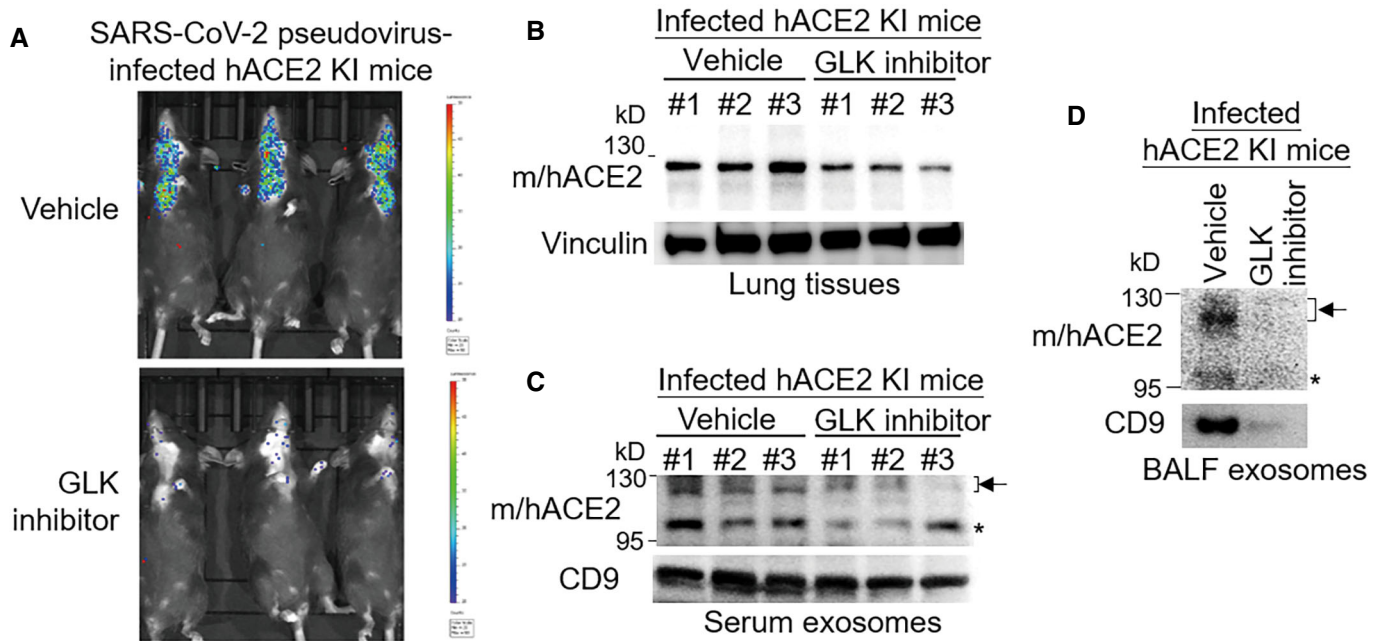

**Figure EV5. GLK inhibitor attenuates ACE2 protein levels, ACE2-containing exosomes, and SARS-CoV-2 pseudovirus infection.**

A–D Human ACE2 KI mice were intranasally infected with SARS-CoV-2 pseudovirus on Day 0 and Day 1. Mice were also treated with the GLK inhibitor verteporfin on Day 0 after infection.  $n = 3$  (biological replicates) per group. Infection efficiencies of SARS-CoV-2 pseudovirus in mouse tissues were measured by IVIS and presented as luminescence counts on Day 2 (A). Immunoblotting of ACE2 and vinculin in the lung tissues of the infected hACE2 KI mice with/without the GLK inhibitor verteporfin (10  $\mu$ M in 100  $\mu$ l) treatment (B). Immunoblotting of ACE2 and CD9 in exosomes isolated from the sera (C) and BALF (D) of the infected mice with/without the GLK inhibitor verteporfin (10  $\mu$ M in 100  $\mu$ l) treatment. Arrowhead denotes glycosylated ACE2 proteins; asterisk denotes unglycosylated ACE2 proteins.

Data information: WT, wild-type mice; KI, hACE2 knockin mice.
