# Supplementary material
Source: PubMed Central journal article supplement (PMC9449599)

Figure 6B

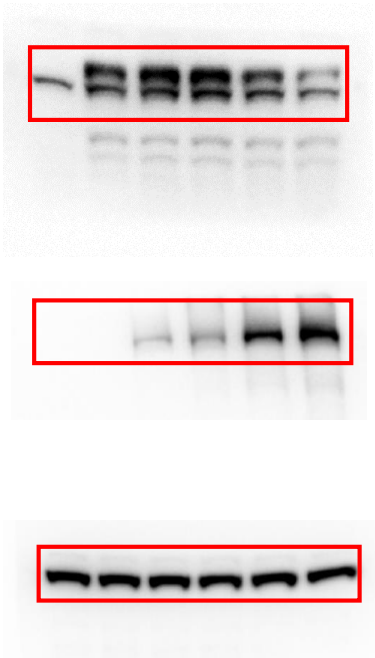

Figure 6C

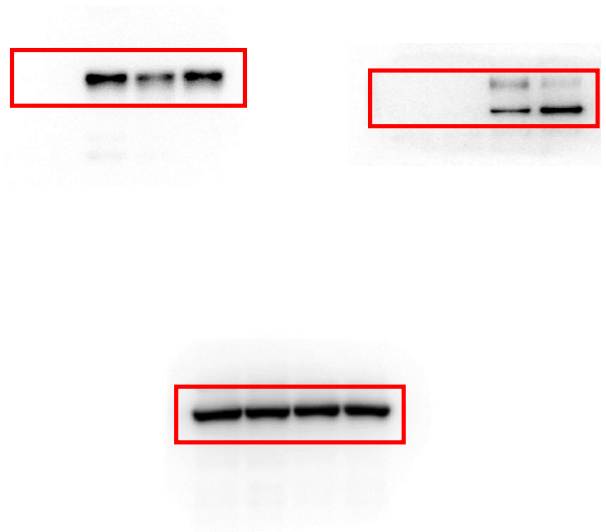

Figure 6D

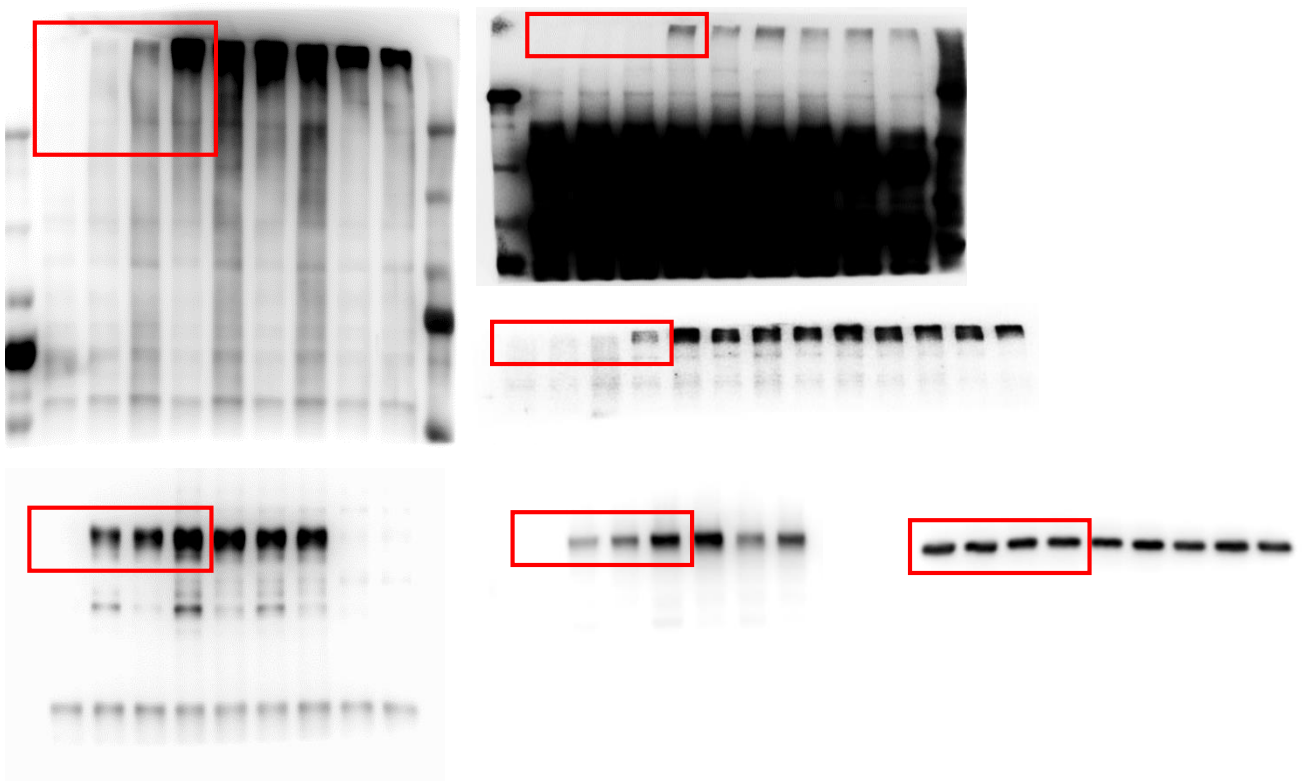

Figure 6G

---

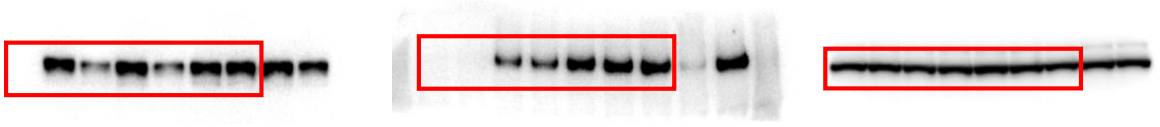

Figure 6H

---

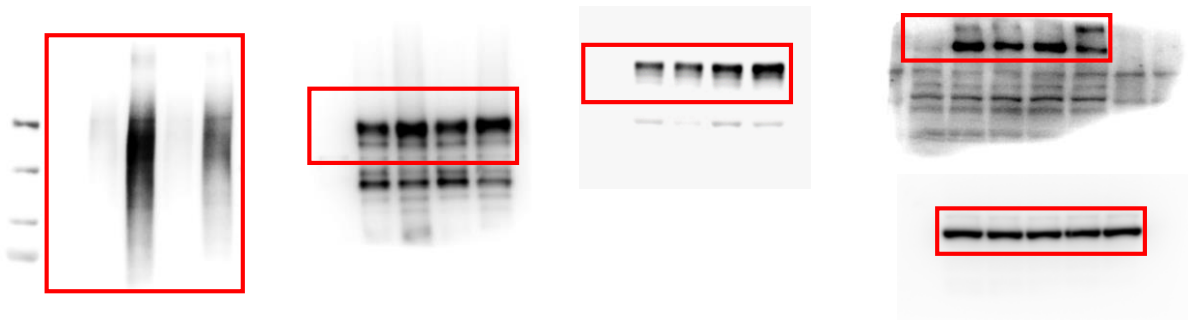

Supplement: EMMM-14-e15904-s011.pdf [file EMMM-14-e15904-s011.pdf]
